# Supplementary material
Source: PubMed Central journal article supplement (PMC2852885)
Supplement: NIHMS188406-supplement-Supplementary.pdf [file NIHMS188406-supplement-Supplementary.pdf]

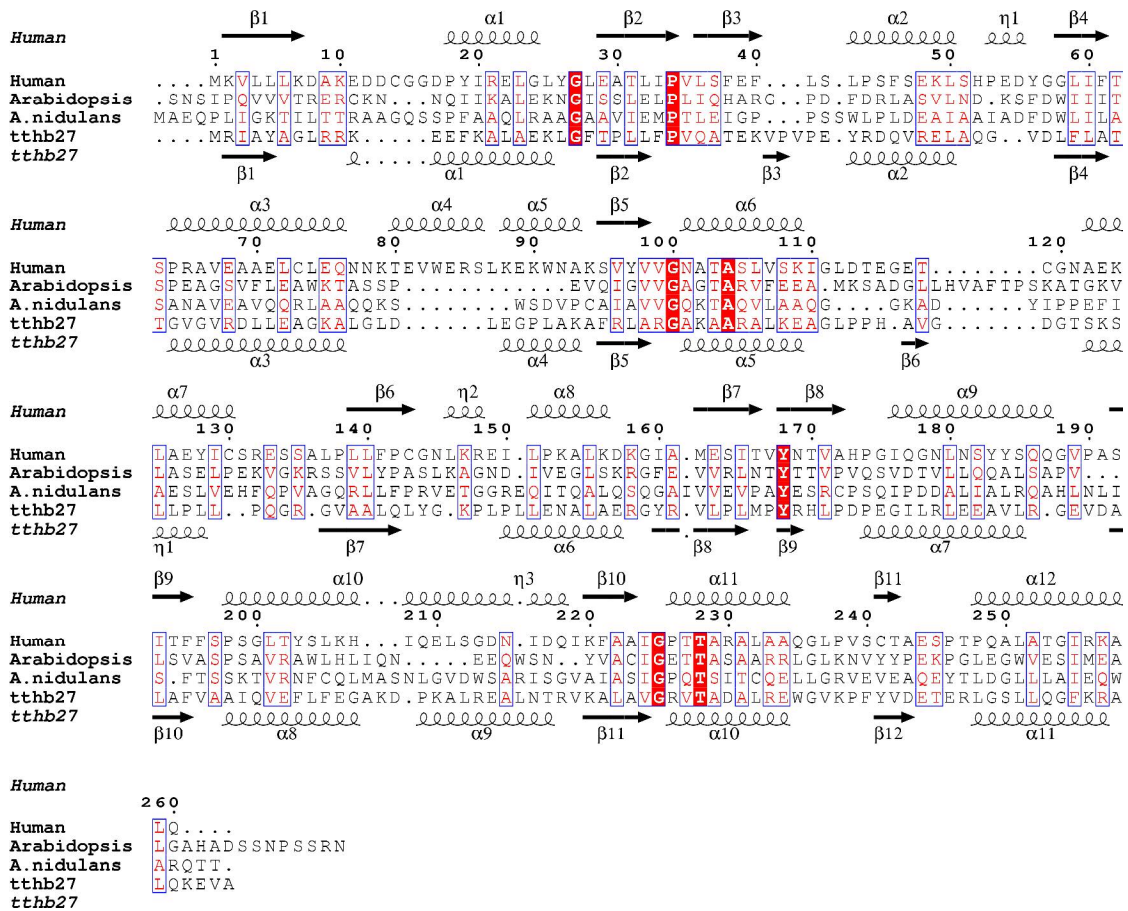

Supplementary Figure 1. Structure-based sequence alignment with corresponding secondary structure assembled using ClustalW, PSIPRED and Dali (26, 34, 37).
